# Supplementary material for: Influence of the Pyrolysis Temperature and TiO2-Incorporation on the Properties of SiOC/SiC Composites for Efficient Wastewater Treatment Applications
Source: MDPI journal article supplement (doi:10.3390/membranes12020175), 2022-02-02
Supplement: s1 [file s1]

## Article

# Supplementary Materials: Influence of Pyrolysis Temperature and TiO<sub>2</sub>-Incorporation on Properties of SiOC/SiC Composites for Efficient Wastewater Treatment Applications

Natália C. Fontão <sup>1</sup>, Lucas N. Ferrari <sup>1,2</sup>, Joice C. Sapatieri <sup>1,3</sup>, Kurosch Rezwan <sup>1,4</sup> and Michaela Wilhelm <sup>1,\*</sup>

<sup>1</sup> Advanced Ceramics, University of Bremen, 28359 Bremen, Germany

<sup>2</sup> Department of Mechanical Engineering, Federal University of Santa Catarina, Florianopolis 88040-900, Brazil

<sup>3</sup> Department of Chemical Engineering and Food Engineering, Federal University of Santa Catarina, Florianopolis 88040-900, Brazil

<sup>4</sup> MAPEX—Centre for Materials and Processes, University of Bremen, 28359 Bremen, Germany

\* Correspondence: mwillhelm@uni-bremen.de

## Supplementary Data

**Table S1.** Membrane composition

| Sample   | MK (g) | H44 (g) | AZO (g) | SiC (g) | TiO <sub>2</sub> (g) | Imidazole (g) |
|----------|--------|---------|---------|---------|----------------------|---------------|
| T0_Si59  | 2.0    | 2.0     | 3.0     | 5.9     | 0                    | 0.1           |
| T5_Si54  | 2.0    | 2.0     | 3.0     | 5.4     | 0.5                  | 0.1           |
| T10_Si49 | 2.0    | 2.0     | 3.0     | 4.9     | 1.0                  | 0.1           |

**Citation:** Fontão, N.C.; Ferrari, L.N.; Sapatieri, J.C.; Rezwan, K.; Wilhelm, M. Influence of Pyrolysis Temperature and TiO<sub>2</sub>-Incorporation on Properties of SiOC/SiC Composites for Efficient Wastewater Treatment Applications. *Membranes* **2022**, *12*, 175. <https://doi.org/10.3390/membranes12020175>

Academic Editor: Alfredo Cassano

Received: 5 January 2022

Accepted: 28 January 2022

Published: 2 February 2022

**Publisher's Note:** MDPI stays neutral with regard to jurisdictional claims in published maps and institutional affiliations.

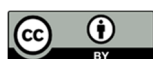

**Copyright:** © 2022 by the authors. Licensee MDPI, Basel, Switzerland. This article is an open access article distributed under the terms and conditions of the Creative Commons Attribution (CC BY) license (<https://creativecommons.org/licenses/by/4.0/>).

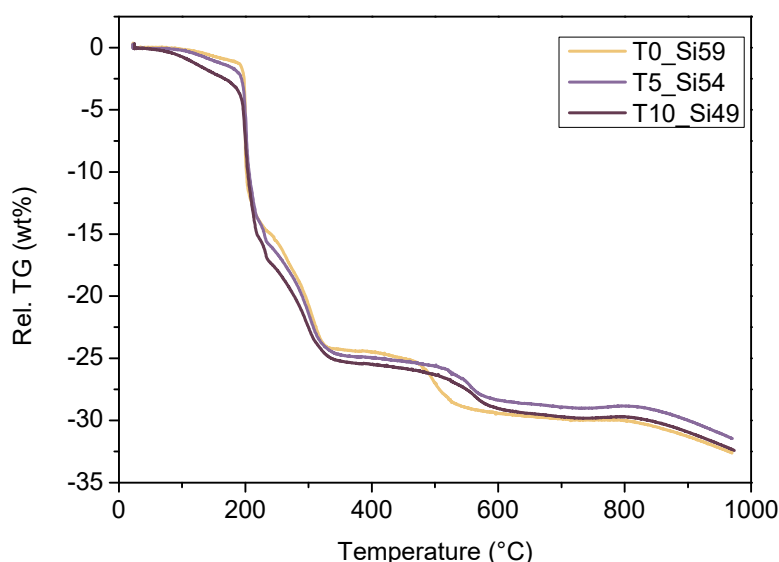

**Figure S1.** Thermal Gravimetric analysis for samples T0\_Si59, T5\_Si54 and T10\_Si49.

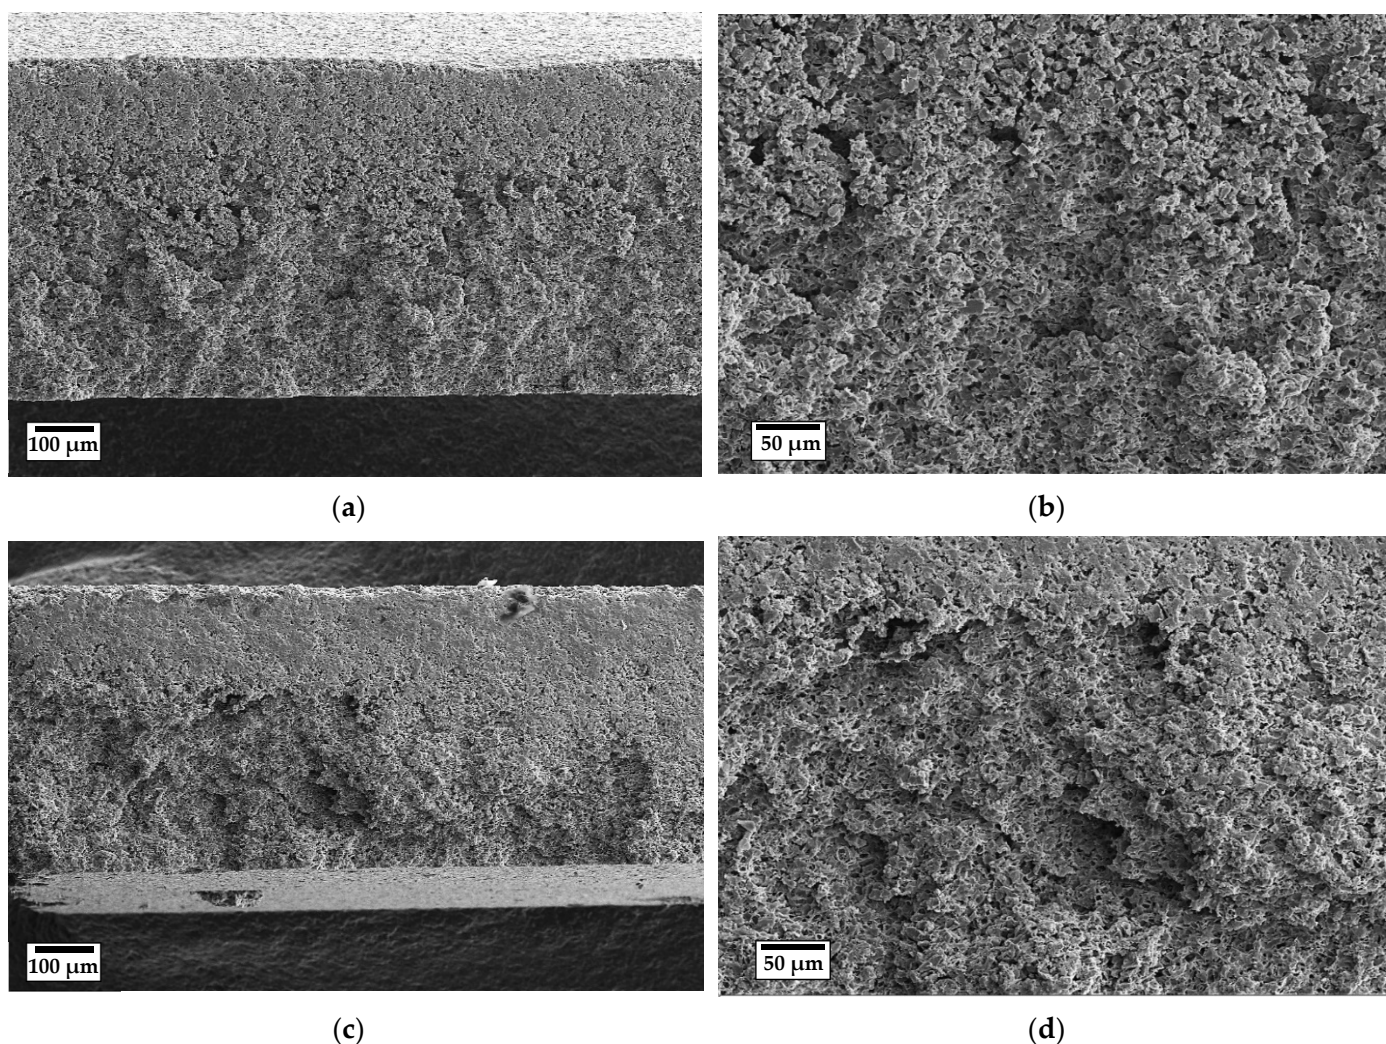

**Figure S2.** SEM images of the cross-section areas of samples T0\_Si59-700 (a,b) and T10\_Si59-700 8 (c,d) revealing symmetrical sponge-like structures.

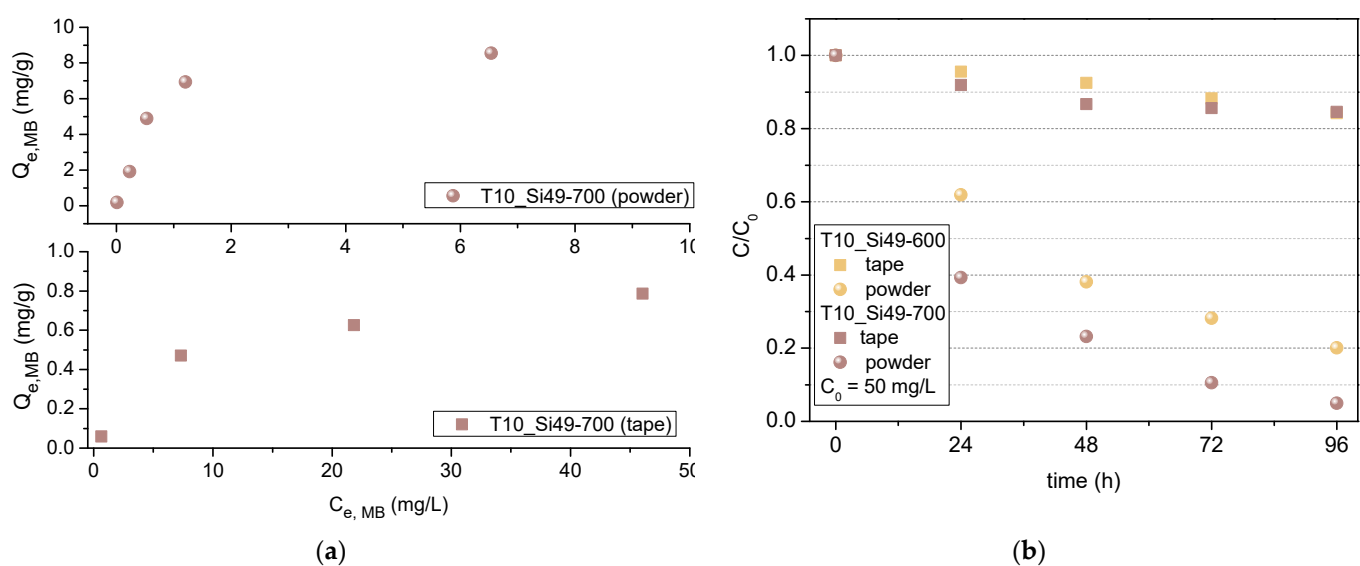

**Figure S3.** (a) MB adsorption isotherms of the sample T10-700 as a powder and as a tape. (b) MB removal over time using samples T10-600 and T10-700 as powders and as tapes (96 h).

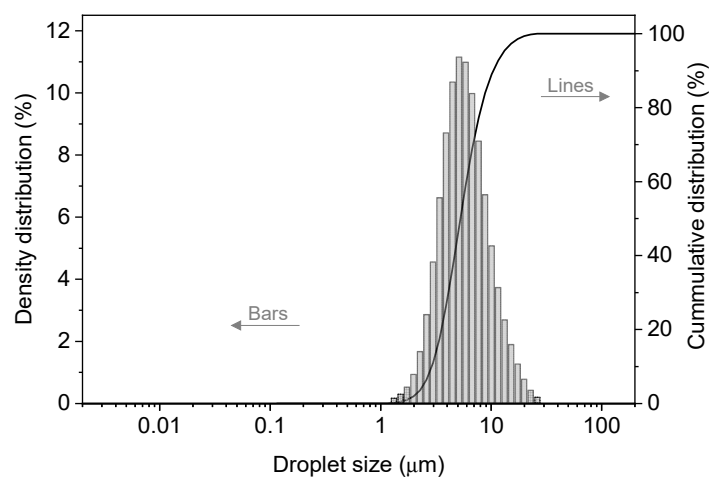

**Figure S4.** Droplet size distribution of the feed O/W emulsion (MCT oil,  $C_0 = 1000 \text{ mg/L}$ ).
